# Supplementary material
Source: PubMed Central journal article supplement (PMC7768719)

## 1 **SI Materials and Methods**

2

### 3 **Cell culture**

4 All gastric cancer cell lines were purchased from the KCLB (Korean Cell Line Bank) at Seoul National  
5 University. AGS, MKN-28, MKN-45, NCI-N87, SNU-484, SNU-601, SNU-668, and SNU-719 cells were  
6 maintained in Roswell Park Memorial Institute 1640 (RPMI-1640, Corning, NY, USA) supplemented with 10%  
7 FBS (GIBCO) and 1% penicillin/streptomycin (pen-strep, Invitrogen, Carlsbad, CA). YCC-6 and YCC-16 cells  
8 were maintained in Minimal Essential Medium (MEM, HyClone-Thermo Scientific, South Logan, UT, USA)  
9 supplemented with 10% FBS and 1% pen-strep. Hs746T cells were maintained in Dulbecco's Modified Eagle's  
10 Medium (DMEM, HyClone-Thermo Scientific, South Logan, UT, USA) supplemented with 10% FBS and 1%  
11 pen-strep. All cells were maintained in a humidified environment at 5% CO<sub>2</sub> and 37°C.

12

### 13 **RNAi-mediated gene knockdown**

14 The ON-TARGET plus SMARTpool for the human *ELOVL4* siRNA (L-010269-00), *ELOVL5* siRNA  
15 (L-009260-01), *FADS1* siRNA (L-008210-01) and a nontargeting pool (siNT, D-001810-10) were purchased from  
16 Dharmacon (Lafayette, CO, USA). Hs746T and SNU-484 cells were transfected with 20 nM siRNA using  
17 Lipofectamine RNAiMAX (Invitrogen) via the reverse-transfection method according to the manufacturer's  
18 protocol. Knockdown efficiencies were confirmed using qRT-PCR or western blot analysis.

19

### 20 **Generation and validation of the *ELOVL5*- and *FADS1*-KO cell lines**

21 CRISPR/Cas9-mediated disruption of the *ELOVL5* and *FADS1* genes was performed using  
22 pSpCas9(BB)-2A-GFP (PX458; Addgene #48138) and pSpCas9(BB)-2A-RFP plasmids (1). Guide RNAs  
23 (gRNAs) targeting three different sites of the human *ELOVL5* gene (gRNA#1; 5'-  
24 GGCTGGGACCAAAATACATGAGG-3', gRNA#2; 5'-TATACACCACTAAAATCCCCCGG-3', and gRNA#3;  
25 5'-AGTTGTCTCTACACCCAAGCGG-3') and the human *FADS1* gene (gRNA#1; 5'-  
26 TTCCATTGGCCGAGCCTCGTGG-3', gRNA#2; 5'-ACATCAGCGAGTTCACCCGCCGG-3', and gRNA#3;  
27 5'-CTCCTAGCCTACCCAGCTCGGGG-3') were cloned into pSpCas9(BB)-2A-GFP or pSpCas9(BB)-2A-RFP  
28 (SI Appendix, Fig. S2 *G and N*). YCC-16 cells were co-transfected with three plasmids targeting each gene using  
29 Lipofectamine 3000 reagent (Invitrogen). After 24 hours, single cells positive for both GFP and RFP were isolated  
30 using FACS and single-cell clones were obtained. *ELOVL5*- and *FADS1*-KO clones were verified by performing

1 an immunoblot analysis and DNA sequencing of PCR products generated with the primers around the gRNA  
2 target sites (*ELOVL5* forward: 5'- CATGTAACAAGGAGCTTCACCTTGTTTGAT-3', *ELOVL5* reverse: 5'-  
3 AATACTTTAATTTTGAATATCATACGAAAC-3', *FADS1* forward: 5'-  
4 AGCCCAGCTGTGAGTTGCCCAAGAC-3', *FADS1* reverse: 5'- ATCGAGACAGGATGTGACTCCCTCC-3').

### 7 **Cell viability and LDH release assays**

8 Cell viability was determined by measuring the cellular ATP levels using the CellTiter-Glo reagent  
9 according to the manufacturer's protocol (CellTiter-Glo® 2.0 Assay, G9243, Promega). Cell-free supernatants  
10 were collected and assessed using the LDH release assay with a Cytotoxicity Detection kit (11644793001, Roche).  
11 The percent of LDH release was calculated according to the manufacturer's instructions.

### 13 **Lipid peroxidation assay**

14 Lipid peroxidation was determined with flow cytometry using C11 BODIPY 581/591. First, 200,000  
15 cells were seeded in each well of 6-well plates one day before the experiment. To measure the lipid peroxidation  
16 levels, cells were treated with RSL3 (1  $\mu$ M), followed by an incubation with 2.5  $\mu$ M C11 BODIPY 581/591 at  
17 37°C for 15 min. Cells were then harvested by trypsinization and transferred to a 1.5 ml microfuge tube, pelleted  
18 (3000 rpm, 3 min), and resuspended in 0.5 ml of PBS. The cells were analyzed using the 488-nm laser of a flow  
19 cytometer (BD FACSCalibur) for excitation, and data were collected from the FL1 detector. A minimum of 10,000  
20 cells were analyzed per condition. Data were analyzed using FlowJo software.

### 22 **Glutathione assay**

23 On the day before the experiment, Hs746T and NCI-N87 cells were seeded in 6-well plates. After 8 and  
24 12 h of cysteine deprivation, the cells were harvested and lysed in MES buffer. The total intracellular glutathione  
25 content was determined using a glutathione assay kit according to the manufacturer's instructions (703002,  
26 Cayman Chemical). Glutathione levels were calculated using a glutathione standard curve and normalized to the  
27 total protein concentration in each sample.

### 29 **DPPH radical scavenging assay**

30 The DPPH radical scavenging activities of SC-26196 and CP-24879 were evaluated using a

1 spectrophotometer. Briefly, 1 ml of freshly prepared 0.1 mM DPPH in ethanol was mixed with different  
2 concentrations of SC-26196 and CP-24879. The mixture was incubated in the dark for 30 min. After incubation,  
3 the absorbance was measured at 515 nm.

#### 5 **qRT-PCR analysis**

6 Total cellular RNA was extracted using an Easy-spin Total Extraction kit (17221, Intron Biotechnology,  
7 Korea) according to the manufacturer's instructions. The RNA concentration of each sample was determined by  
8 measuring the absorbance at 260 nm. Two micrograms of RNA from each sample were reverse transcribed into  
9 cDNAs using M-MLV reverse transcriptase (M1705, Promega) according to the manufacturer's instructions.  
10 Amplified cDNAs were analyzed using a CFX96 TOUCH Real-Time PCR (Bio-Rad) instrument with the  
11 following primers: *ELOVL2* (forward), 5'-AGGCTACAACCTTACAGTGTCAAG-3'; *ELOVL2* (reverse), 5'-  
12 GAGAAATAGTACCACCAAAGCAC-3'; *ELOVL4* (forward), 5'-TCACTGTACGATGTTTACCTTGT-3';  
13 *ELOVL4* (reverse), 5'-GCCAAATGCAGTTAACCCATAG; *ELOVL5* (forward), 5'-  
14 AATAAACAGCCATTCTCTTGCC-3'; *ELOVL5* (reverse), 5'-GCCTTCCCATACTCCTGTTAC-3'; *FADS1*  
15 (forward), 5'-CAGACATCAACATGCATCCCT-3'; *FADS1* (reverse), 5'-AGAAGTATTTGTGCTGGTGGT-3';  
16 *FADS2* (forward), 5'-TTAACTTCCAGATTGAGCACCA-3'; *FADS2* (reverse), 5'-  
17 TTGGCACATAGAGACTTCACC-3'; *ACSL4* (forward), 5'-TCATGTGCTAGAACTGACAGC-3'; *ACSL4*  
18 (reverse), 5'-GTACAGTCTCCTTTGCTTCCTT-3';  *$\beta$ -Actin* (forward), 5'-CTGGCACCCAGCACAATG-3'; and  
19  *$\beta$ -Actin* (reverse), 5'-GCCGATCCACACGGAGTACT-3'.

#### 21 **Lipid analysis using LC-MS/MS**

22 For global lipid profiling,  $1 \times 10^7$  cells were rinsed twice with cold PBS and then with cold water. The  
23 cellular lipids were extracted by scraping the cells off the dishes into 1 ml of prechilled 80:20 (v/v) methanol:water  
24 twice. After clarification by centrifugation, the supernatant was transferred to a new tube, and 2 ml of chloroform  
25 and 1 ml of 0.1 M HCl were added. The mixture was cleared by centrifugation. The lipid extracts were dried under  
26 nitrogen gas and reconstituted with 250  $\mu$ l of an isopropanol:acetonitrile:water (2:1:1, v/v/v) solution. For the  
27 analysis of PUFAs, PE-(18:0/20:4), and PE-(18:0/22:4), cells were plated in six-well plates. The lipids were  
28 extracted in 400  $\mu$ l of a 40:40:20 acetonitrile:methanol:water solution containing 0.5% formic acid. The extracts  
29 were cleared by centrifugation, and the lipids in the supernatant were directly analyzed. [ $U$ - $^{13}C_{16}$ ] Palmitic acid,  
30 tridecanoic acid, and PE-(33:1-d7) were used as internal standards. The lipid analysis was conducted using an

1 ACQUITY UPLC system (Waters, Milford, MA, USA) coupled to a triple TOF<sup>TM</sup> 5600 mass spectrometer  
2 equipped with an electrospray ionization (ESI) source (AB Sciex, Concord, ON, Canada). Chromatographic  
3 separation was performed using an Acquity UPLC BEH C18 column (2.1 mm × 100 mm, 1.7 μm; Waters) at 35°C;  
4 binary gradient separation was performed at a flow rate of 0.35 ml/min. The injection volume was 5 μl for the  
5 negative ion mode. The mobile phases consisted of 10 mM ammonium acetate in water:acetonitrile (60:40 v/v,  
6 solvent A) and 10 mM ammonium acetate in isopropanol:acetonitrile (90:10 v/v, solvent B). The steps of the  
7 gradient profile used to equilibrate the initial gradient for subsequent runs were 40-65% B from 0-5 min, 65-70%  
8 B from 5-12 min, 70-99% B from 12-15 min, 99% B from 15-17 min, 99-40% B from 17-17.1 min, and 40% B  
9 from 17.1-20 min. The mass spectrometer was operated in negative ion mode, and data were acquired in the mass  
10 range of 80-1500 *m/z* for the analysis of the lipid extracts. Total ion chromatograms were acquired using the  
11 following operating parameters: a capillary voltage of -4,500 V, a nebulizer pressure of 50 psi, a drying gas  
12 pressure of 60 psi, a curtain gas pressure of 30 psi, a source temperature of 500°C, a declustering potential of -90  
13 eV, a collision energy of -10 eV for single MS, and a collision energy of -45 eV for MS/MS. Data from MS/MS  
14 analyses were acquired using automatic fragmentation, in which the five most intense mass peaks were fragmented.  
15 Mass accuracy was maintained with an automated calibrant delivery system interfaced to the second inlet of the  
16 DuoSpray source. Spectral data were analyzed with MarkerView<sup>TM</sup> (AB Sciex) to identify peaks, perform  
17 alignments, and generate peak tables of *m/z* values and retention times for samples.

18

### 19 **DNA methylation**

20 A SureSelectXT Human Methyl-Seq panel (Agilent Technology, Santa Clara, CA, USA) was used for  
21 the quantitative analysis of DNA methylation with a HiSeq 2500 Sequencer (Illumina, San Diego, CA, USA).  
22 Raw fastq reads were processed using a pipeline including read quality filtering, genomic alignment with Bowtie2  
23 to the reference human genome hg19, and methylation calling with Bisulfite Read Mapper, Bismark2. The  
24 functional information of variants was annotated using SnpEff4. For the statistical analyses, R (version 3.6.1)  
25 packages, including edgeR (Bioconductor), were used. Differentially methylated CpG loci were identified using  
26 the calculated logFC values. The methyl-Seq results were deposited in the Sequence Read Archive (SRA) database  
27 of NCBI (accession number PRJNA608754).

28

### 29 **Classification of GCs**

30 We obtained the gene expression profiles of GC lines using a HumanHT-12 v3.0 Expression BeadChip

1 array (Illumina; San Diego, CA, USA) and deposited the data into Gene Expression Omnibus (accession ID:  
2 GSE146361). GC lines were classified into molecular subtypes using the non-negative matrix factorization  
3 clustering method (R package “NMF” version 0.21.0), where we applied subtype-specific gene signatures that  
4 were previously defined in primary tumor tissues (2). We calculated stromal and stem-like scores using a single  
5 sample GSEA (GenePattern [www.genepattern.org](http://www.genepattern.org)) with the previously defined gene sets (2, 3). Mesenchymal and  
6 Intestinal GC cell types are representative in vitro surrogates for chemo-refractory and chemo-sensitive GC  
7 patients identified by nProfiler 1 Stomach Cancer assay (2).

8

1 **Dataset S1.** Subtype classification, stem-like score, and stromal score of the gastric cancer cell lines used in this  
2 study.

3 **Dataset S2.** Microarray data of gastric cancer cell lines

4 **Dataset S3.** Fold changes in the expression of genes associated with lipid and iron metabolism in mesenchymal-  
5 type GCs (Hs746T, SNU-484, SNU-668, and YCC-16) compared with intestinal-type GCs (MKN-45, NCI-N87,  
6 SNU-601, and SNU-719) based on the microarray data.

7

## 8 **Supplementary Figure Legends**

9

10 **Fig. S1. Mesenchymal-type GCs, but not intestinal-type GCs, are sensitive to ferroptosis upon**  
11 **cysteine/methionine depletion.** (A) GSH levels in mesenchymal-type (Hs746T and SNU-484) and intestinal-  
12 type (NCI-N87 and SNU-719) GCs cultured in cysteine/methionine-deficient medium. Data are the means  $\pm$  s.d.  
13 (n=3 independent experiments, with \*\*\*P < 0.001 according to two-sided Student's t-tests). (B and C) Relative  
14 viability (B) and cell death (C) of GCs cultured in cysteine/methionine-deficient medium, as determined using  
15 CellTiter-Glo and lactate dehydrogenase (LDH) release assays. Data are the means  $\pm$  s.d. (n=3 independent  
16 experiments, n.s. denotes not significant, \*P < 0.05 and \*\*\*P < 0.001 according to two-sided Student's t-tests).

17

18 **Fig. S2. Validation of antibodies against ELOVL5 and FADS1.** (A) Relative mRNA expression levels in GCs  
19 determined using a microarray analysis. Data are the means  $\pm$  s.d. (n=3 independent experiments). (B) Levels of  
20 the ELOVL5 protein in GCs detected using two ELOVL5 antibodies, as indicated. The asterisk indicates  
21 nonspecific bands. (C) Depletion of the *ELOVL5* mRNA in Hs746T and SNU-484 cells was confirmed by the  
22 qRT-PCR analysis. Data are the means  $\pm$  s.d. (n=3 independent experiments). (D and E) ELOVL5 expression  
23 levels in mesenchymal-type (YCC-16, Hs746T, and SNU-484) and intestinal-type (SNU-719) cells lacking  
24 ELOVL5 with boiling. (F) Western blot analysis using unboiled lysates. (G) Schematic showing guide RNA  
25 (gRNA) target sites within exon 3 (E3) and intron 3 of *ELOVL5* used to generate the ELOVL5 KO#1 and KO#2  
26 clones. Notably, gRNA#1 (gR1) was subcloned into pSpCas9(BB)-2A-GFP and gRNA#2 (gR2) and gRNA#3  
27 (gR3) was subcloned into pSpCas9(BB)-2A-RFP. (H) Verification of the ELOVL5-KO cell lines by  
28 immunoblotting using boiled lysates. The asterisk indicates nonspecific bands. (I) Western blot analysis using  
29 unboiled lysates. (J) FADS1 proteins were detected with various FADS1 antibodies, as indicated. (K) Depletion  
30 of the *FADS1* mRNA in Hs746T cells and SNU-484 cells was confirmed by the qRT-PCR analysis. Data are the

1 means  $\pm$  s.d. (n=3 independent experiments). (L) Detection of the FADS1 protein, which was depleted by siRNAs  
2 in GCs, using a FADS1 antibody (Atlas Antibodies). (M) Nonspecific detection by other FADS1 antibodies from  
3 Abcam, Santa Cruz, GTX, and Proteintech was confirmed in FADS1-ablated Hs746T cells. (N) Schematic  
4 showing three different guide RNA (gRNA) target sites around exon 1 and intron 1 of *FADS1* used to generate  
5 FADS1 KO#1 and KO#2 clones. For this experiment, gRNA#1 (gR1) and gRNA#3 (gR3) were subcloned into  
6 pSpCas9(BB)-2A-RFP and gRNA#2 (gR2) was subcloned into pSpCas9(BB)-2A-GFP. (O) Verification of the  
7 FADS1-KO cell lines using immunoblotting.

8

9 **Fig. S3. A heat map of the lipid profiles obtained from the UPLC/QTOF MS spectra of mesenchymal-type**  
10 **and intestinal-type GC cells.** Each value in the map is a colored representation of a calculated Z-score. Z-scores  
11 were calculated based on the average value of intestinal-type GC cells and its standard deviation as follows: Z-  
12 score = [(MS intensity of lipid molecules – average of MS intensity of lipid molecules in intestinal-type GC  
13 cells)/standard deviation of MS intensity of lipid molecules in intestinal-type GC cells]. Lipids are presented as  
14 the total number of carbon atoms and the total number of double bonds. Lipids with dissimilar MS/MS spectra  
15 but identical numbers of carbon atoms and an equal number of double bonds are marked with <sup>a</sup>, <sup>b</sup>, and <sup>c</sup>.

16

17 **Fig. S4. Depletion of ELOVL5 or FADS1 decreases the sensitivity of cells to ferroptosis.** (A-C) Relative  
18 viability of Hs746T, SNU-484, and YCC-16 cells treated with RSL3. ELOVL5 and FADS1 were depleted by pool  
19 of four different siRNAs (A and B) or four individual siRNAs (C). (D-F) Lipid peroxidation levels in ELOVL5-  
20 or FADS1-depleted Hs746T, SNU-484, and YCC-16 cells following RSL3 stimulation for 1 h, as measured using  
21 C11 BODIPY 581/591. Data are the means  $\pm$  s.d. (n=3 independent experiments, with \*P < 0.05, \*\*P < 0.01 and  
22 \*\*\*P < 0.001 according to two-sided Student's t-tests). (G and H) Bar plots showing the ratios of AdA (C22:4) to  
23 AA (C20:4) and AA (C20:4) to DGLA (C20:3) in ELOVL5- and FADS1-depleted YCC-16 (G) and Hs746T cells  
24 (H). Levels of PUFAs and PE in ELOVL5- and FADS1-depleted YCC-16 (G) and Hs746T cells (H) determined  
25 using LC-MS/MS. Intensities were normalized to the cellular protein level. Data are the means  $\pm$  s.d. (n=5  
26 independent experiments), with \*P < 0.05, \*\*P < 0.01 and \*\*\*P < 0.001 according to a two-sided Student's test  
27 (n.s. denotes not significant).

28

29 **Fig. S5. The FADS2 inhibitor (SC-26196) shows no antioxidant activity, whereas the FADS1/2 inhibitor**  
30 **(CP-24879) possesses antioxidant activity at high concentrations.** DPPH scavenging activity of FADS

1 inhibitors at various concentrations (SC-26196 and CP-24879). Data are the means  $\pm$  s.d. (n=3 independent  
2 experiments).

3

4 **Fig. S6. Exogenous AA supplementation promotes ferroptosis in intestinal-type GCs.** (A and B) Relative  
5 viability of GCs treated with 2.5  $\mu$ M AA (A and B) and AA-d8, (B) for 16 h, followed by treatment with RSL3  
6 for 24 h. Data are the means  $\pm$  s.d. (n=3 independent experiments), with \*\*P < 0.01 and \*\*\*P < 0.01 according to  
7 two-sided Student's tests. (C) Lipid peroxidation levels in NCI-N87 cells pretreated with 2.5  $\mu$ M PUFAs (linoleic  
8 acid, LA; arachidonic acid-d8, AA-d8) for 16 h and treated with RSL3 for 1 h. Data are the means  $\pm$  s.d. (n=3  
9 independent experiments), with \*\*\*P < 0.01 according to two-sided Student's tests. (D and E) Cell viability and  
10 LDH release from NCI-N87 cells cultured in cysteine/methionine-deficient medium in the presence and absence  
11 of AA and Fer-1. Data are the means  $\pm$  s.d. (n=3 independent experiments, n.s. denotes not significant, \*\*\*P <  
12 0.001 according to two-sided Student's t-tests).

13

14 **Fig. S7. The expression of the *ELOVL5* and *FADS1* genes is inversely correlated with DNA methylation.** (A-  
15 C) *ELOVL5*, *FADS1*, and *ACSL4* mRNA expression and methylation in all cancer cell types (n = 1192). The red  
16 boxes indicate a group of GCs. Data were generated from Project Achilles - DepMap  
17 (<https://depmap.org/portal/achilles/>). Scatter plots showing inverse correlations between the mRNA expression of  
18 the indicated genes and DNA methylation at their promoter regions. Red dots indicate each GC line, and Pearson's  
19 correlation coefficients and P-values are shown in the graphs.

20

21 **Fig. S8. Downregulation of *ELOVL4* alleviates ferroptosis in YCC-16 cells.** (A) Relative viability of  
22 *ELOVL4*-depleted GCs treated with RSL3. (B and C) Relative viability (B) and cell death (C) of *ELOVL4*-  
23 depleted YCC-16 cells. (D) Lipid peroxidation levels in *ELOVL4*-depleted YCC-16 cells following RSL3  
24 stimulation for 1 h, as measured using C11 BODIPY 581/591. Data are the means  $\pm$  s.d. (n=3 independent  
25 experiments, with \*\*\*P < 0.001 according to two-sided Student's t-tests).

26

27



- 1 1. D. Bunina *et al.*, Genomic Rewiring of SOX2 Chromatin Interaction Network during  
2 Differentiation of ESCs to Postmitotic Neurons. *Cell Syst* **10**, 480-494.e488 (2020).
- 3 2. J.-H. Cheong *et al.*, Predictive test for chemotherapy response in resectable gastric cancer:  
4 a multi-cohort, retrospective analysis. *The Lancet Oncology* **19**, 629-638 (2018).
- 5 3. K. Yoshihara *et al.*, Inferring tumour purity and stromal and immune cell admixture from  
6 expression data. *Nat Commun* **4**, 2612-2612 (2013).
- 7

**A**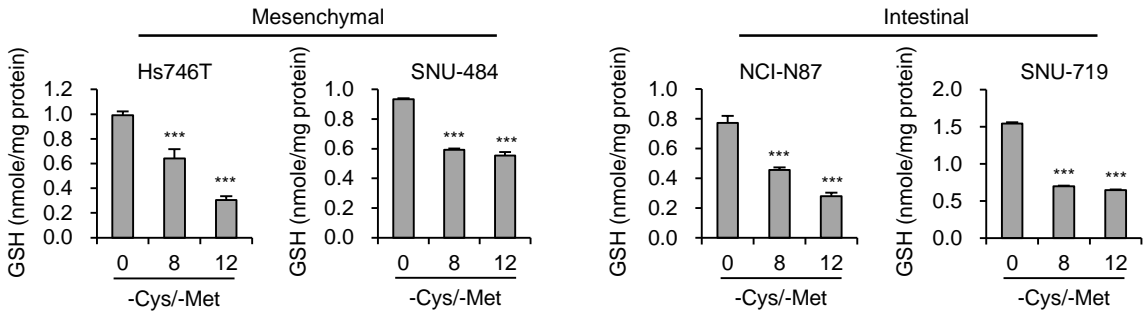**B**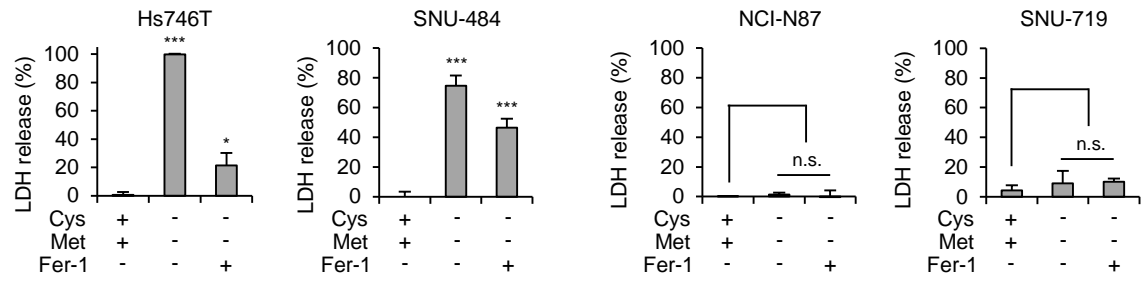**C**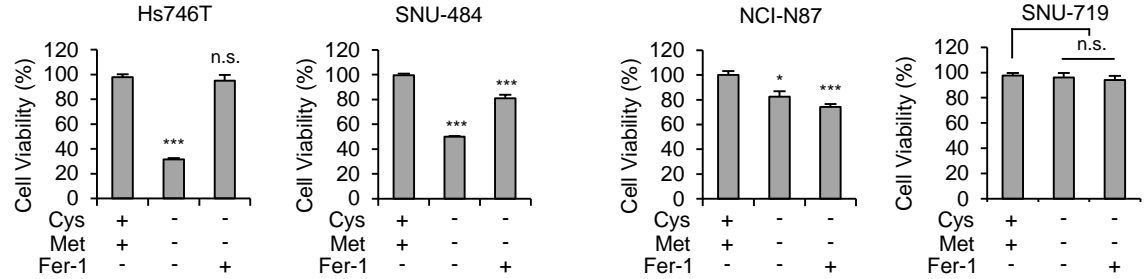

**A**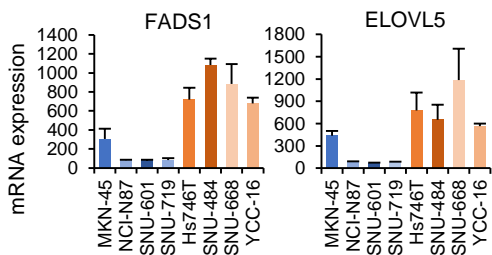**B**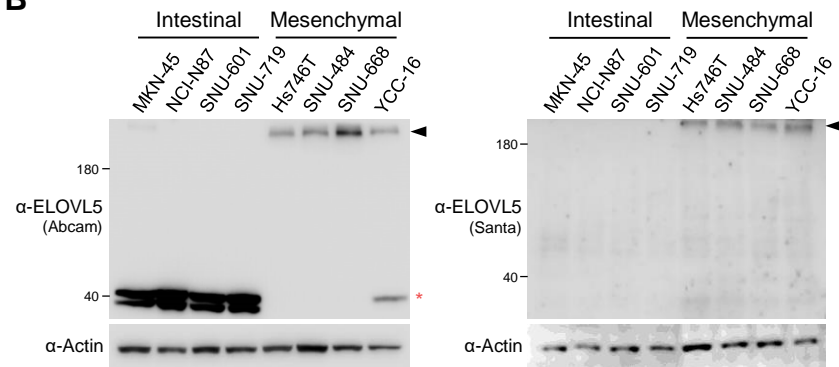**C**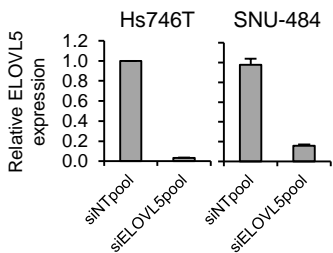**D**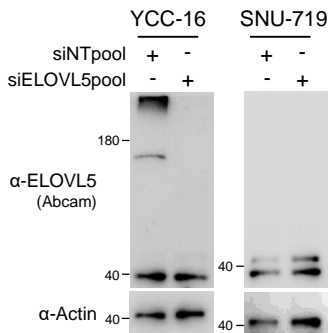**E**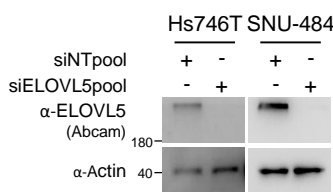**F**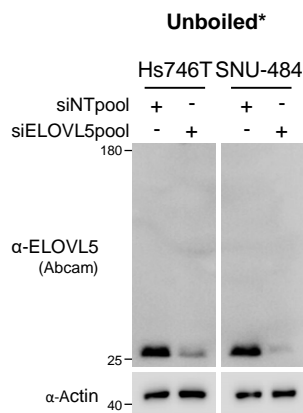**G**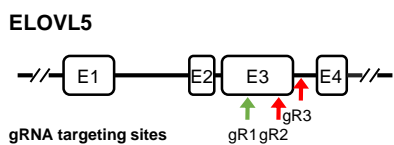**H**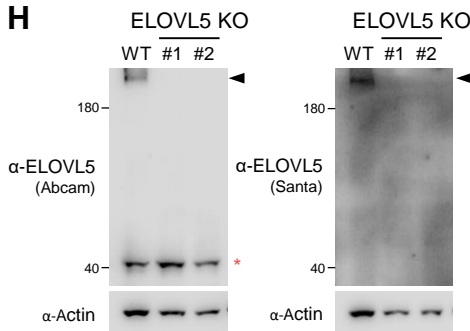**I**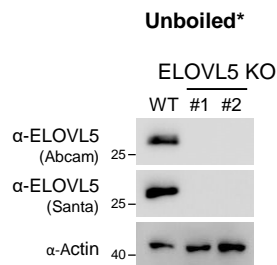**J**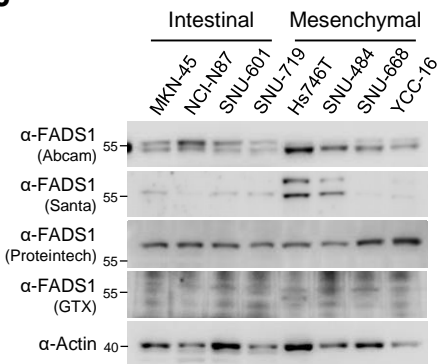**K**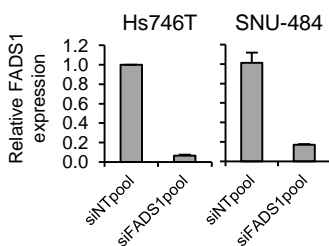**L**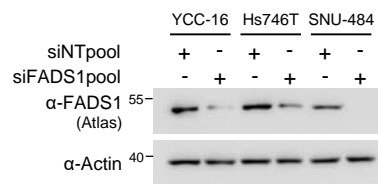**M**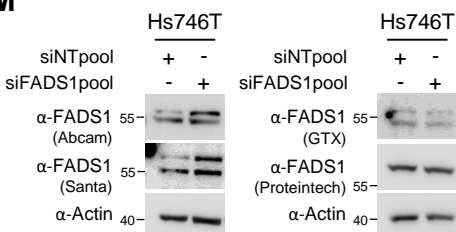**N**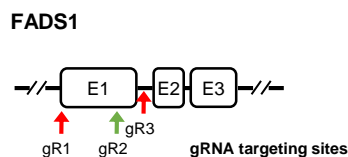**O**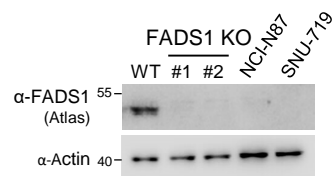



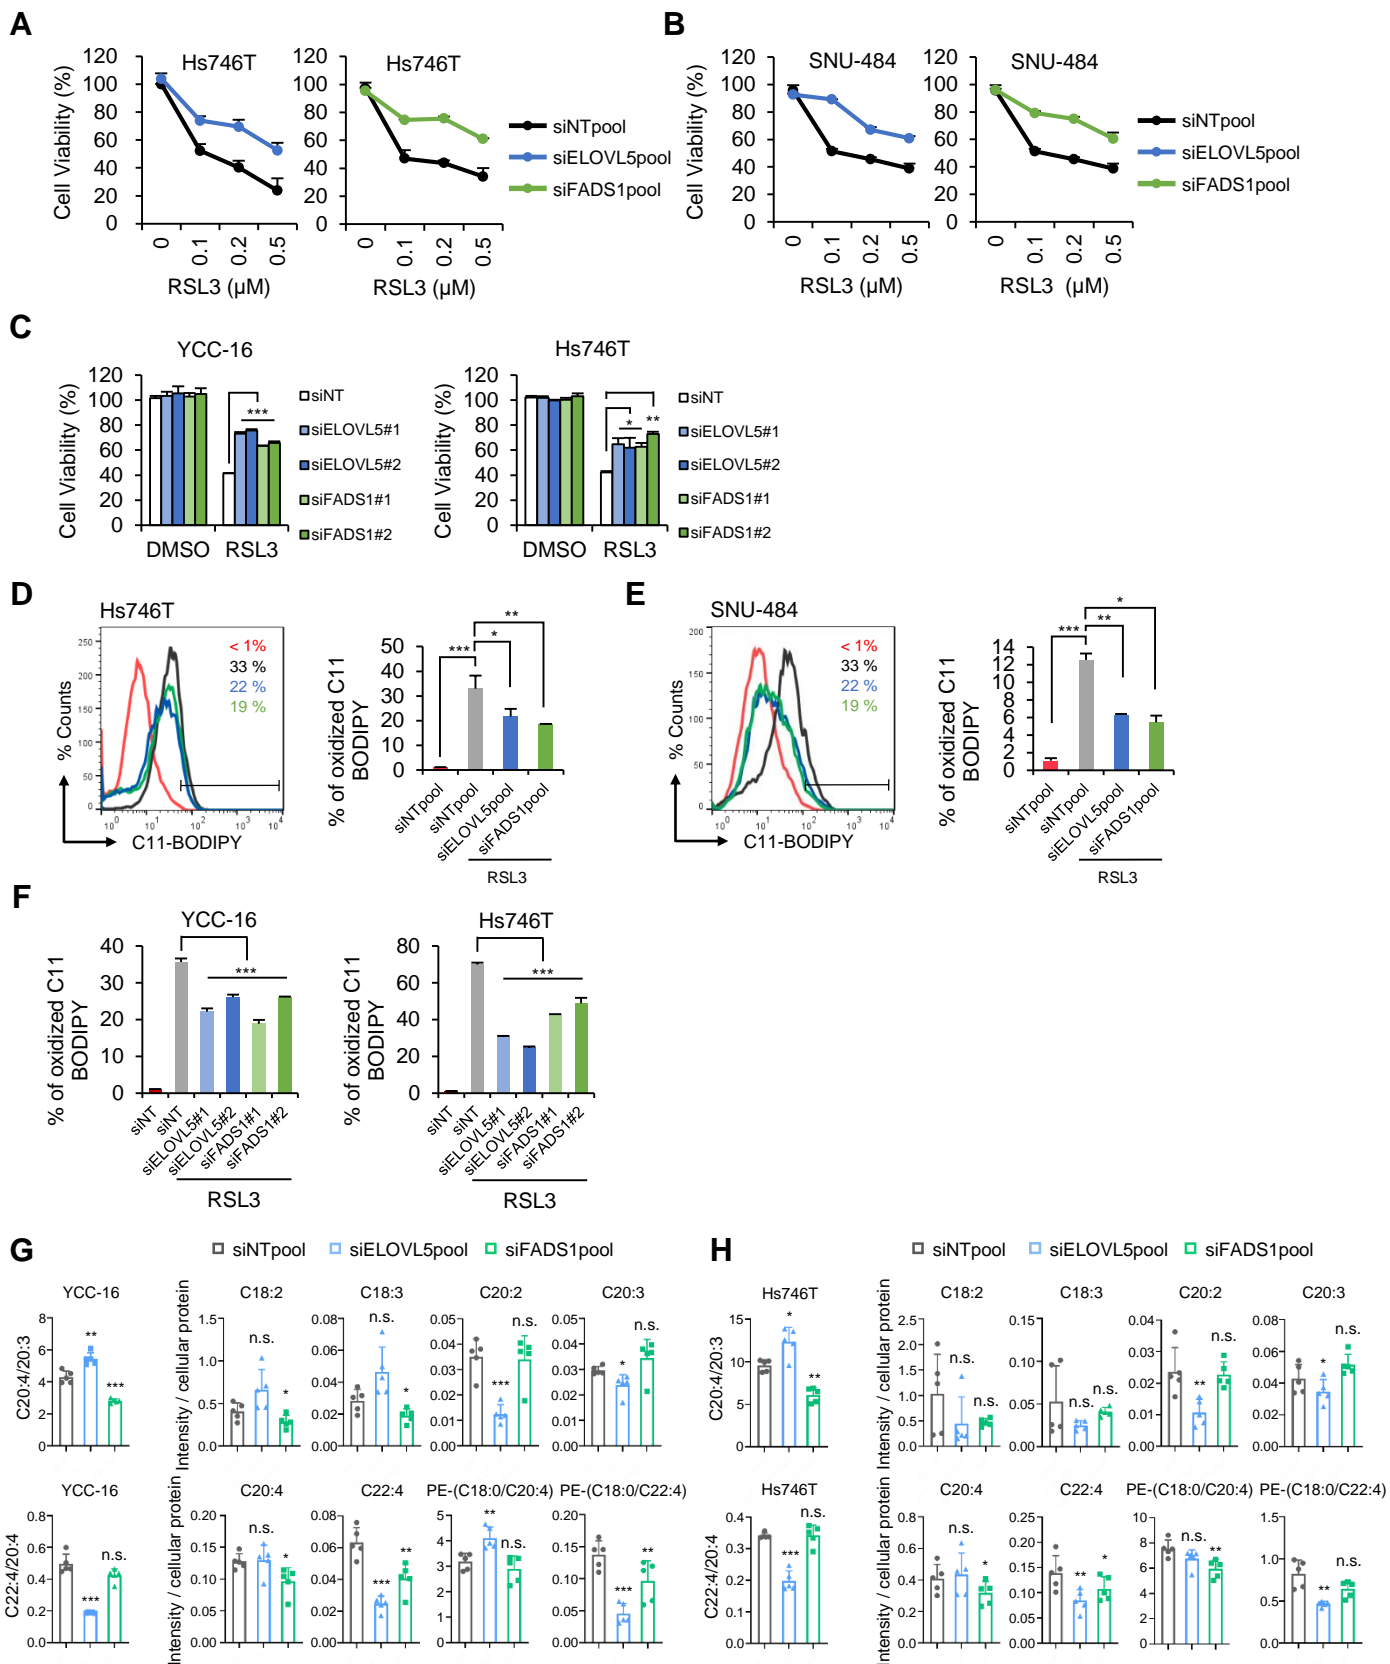

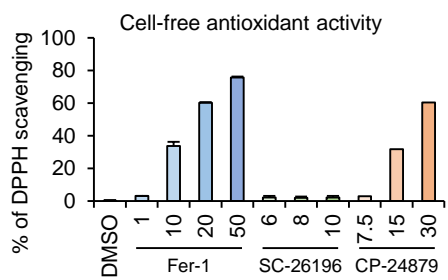

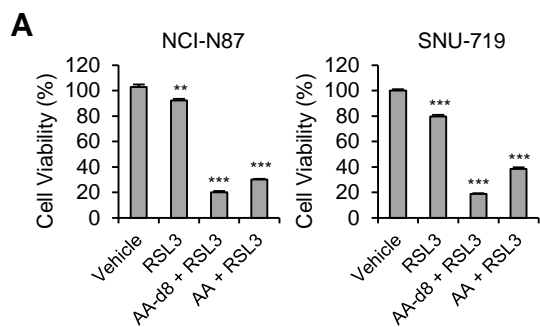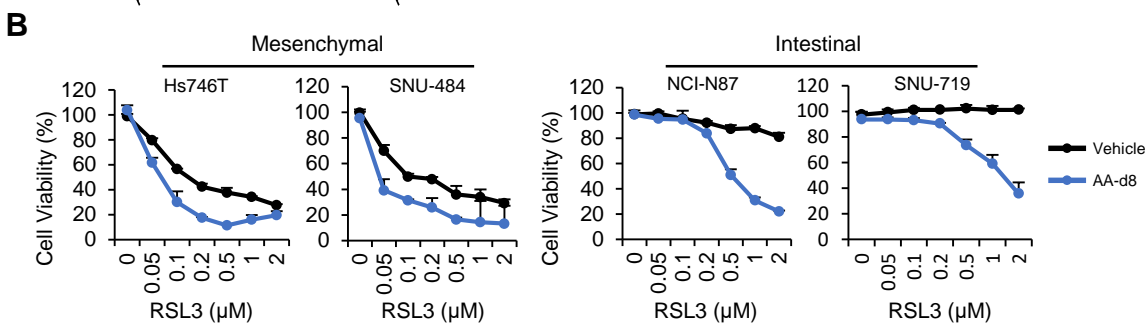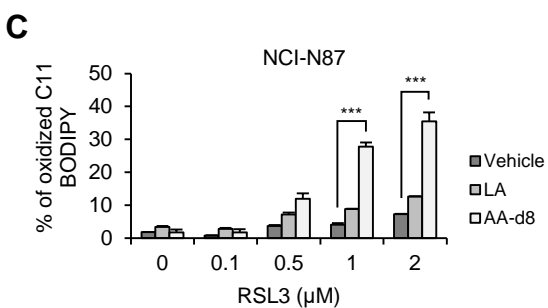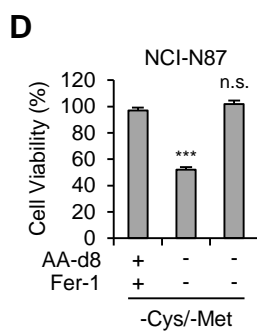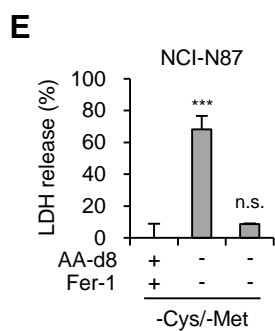

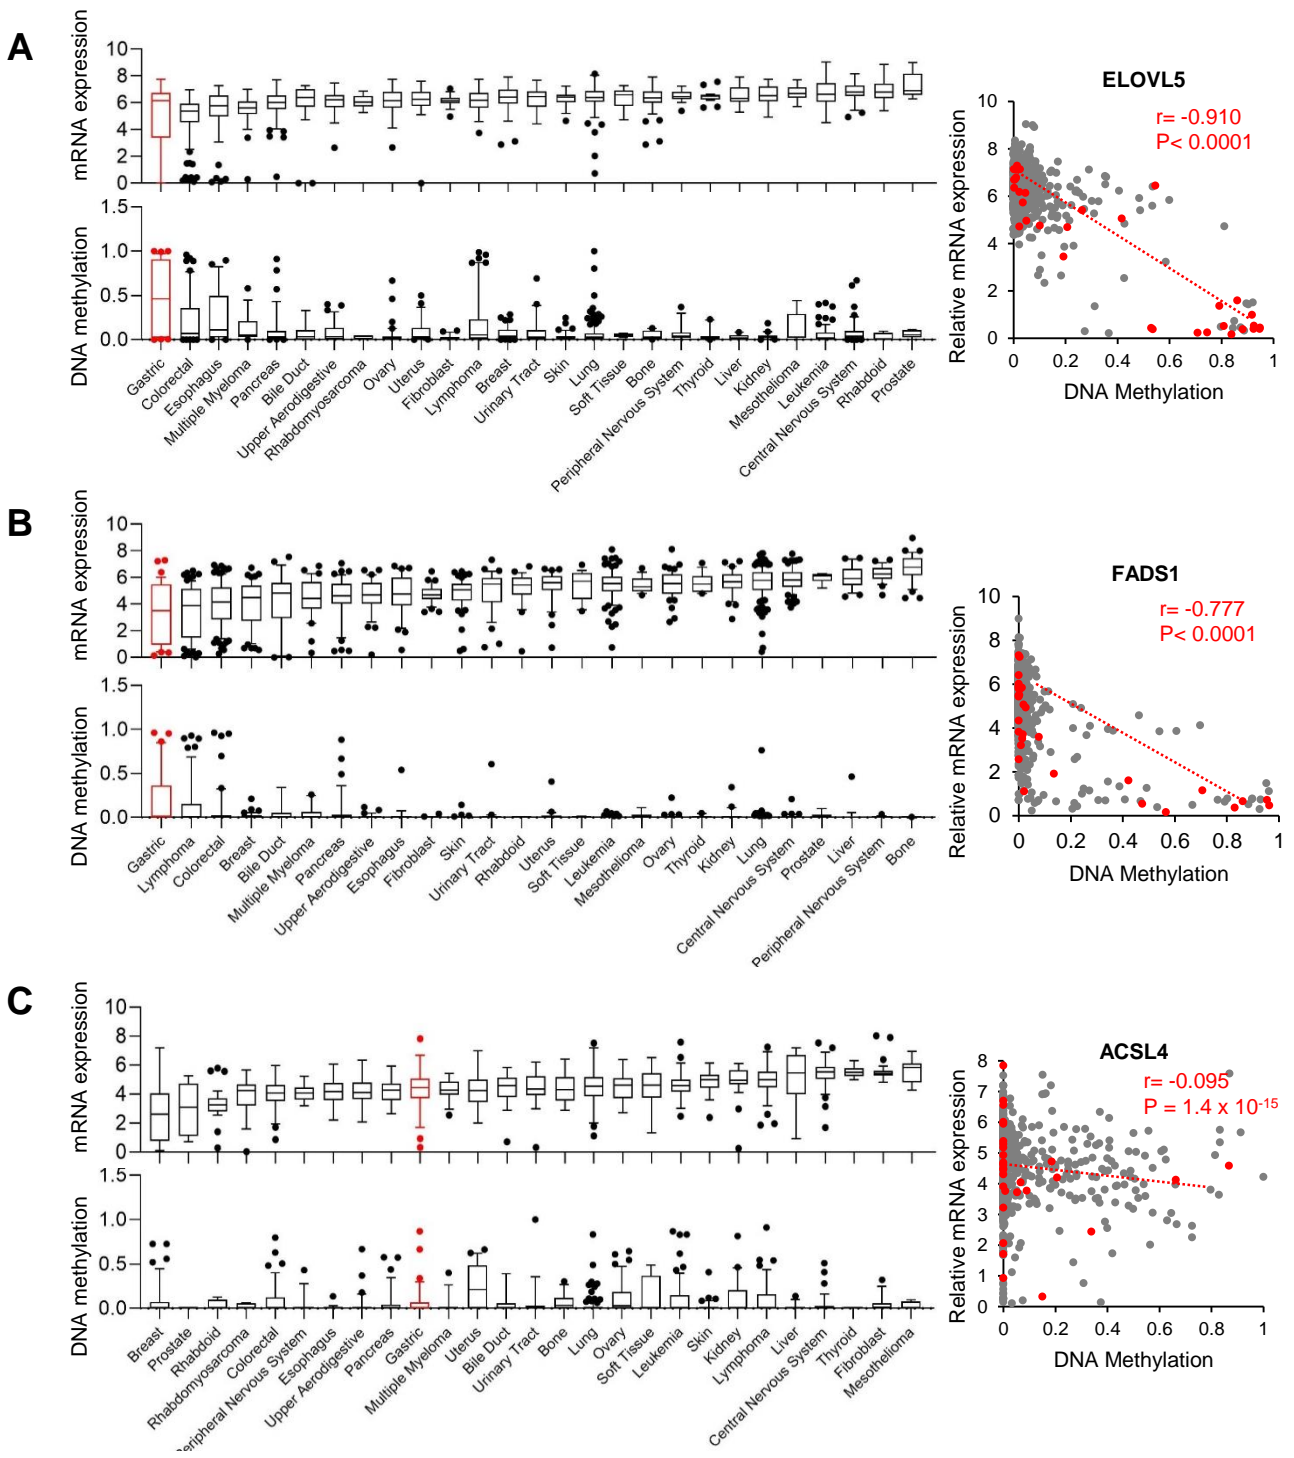



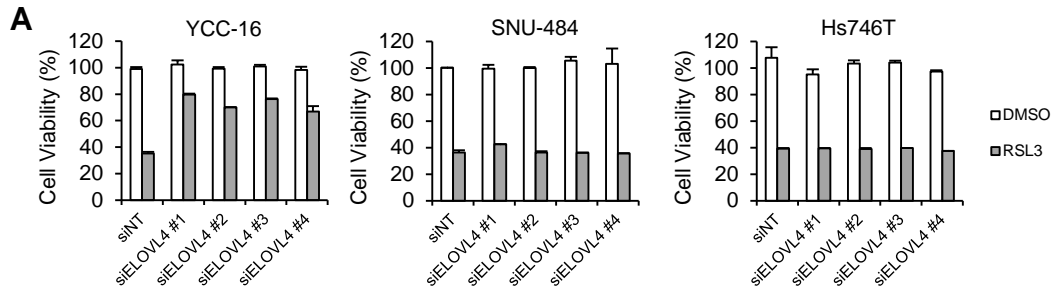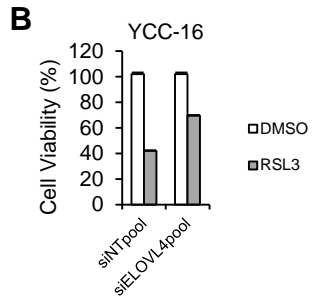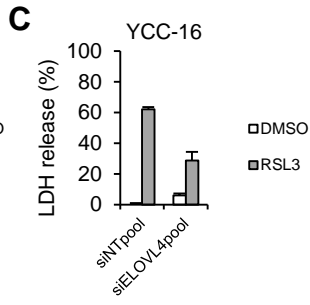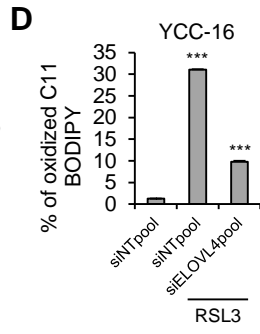

Supplement: pnas.2006828117.sapp.pdf [file pnas.2006828117.sapp.pdf]
